# Supplementary material
Source: ML conference proceedings conference paper supplement (https://www.ecva.net/papers/eccv_2020/papers_ECCV/html/123510069_ECCV_2020_paper.php)
Supplement: Supplementary file 1 [file 123510069-supp.pdf]

|                         | Val-Unseen +pre-exploration |                | Seq2Seq <sub>aps</sub> +pre-exploration |              |
|-------------------------|-----------------------------|----------------|-----------------------------------------|--------------|
| Seq2Seq <sub>rand</sub> | 22.60                       | 23.70 (+4.8%)  | w/ randomly sampled                     | 25.11        |
| Seq2Seq <sub>aps</sub>  | 24.18                       | 26.95 (+11.5%) | w/ APS sampled                          | <b>26.95</b> |

**Table 1.** The comparison between Seq2Seq<sub>rand</sub> and Seq2Seq<sub>aps</sub> with the pre-exploration.

**Table 2.** The comparison between randomly sampled and APS sampled paths during pre-exploration for Seq2Seq<sub>aps</sub>.

|                     | 20%         | 40%         | 60%         | 80%         | 100%        |
|---------------------|-------------|-------------|-------------|-------------|-------------|
| RCM <sub>rand</sub> | 44.2        | 44.5        | 44.9        | 45.8        | 45.6        |
| RCM <sub>aps</sub>  | <b>45.0</b> | <b>46.4</b> | <b>47.2</b> | <b>47.4</b> | <b>47.7</b> |

**Table 3.** The comparison between randomly-sampled and APS-sampled under validation-unseen sets for RCM over different ratios of augmented path used.

## 1 Appendix

### 1.1 aug<sub>rand</sub> + pre-exploration

Since Seq2Seq<sub>rand</sub> does not have a path sampler, it can only randomly sample paths during the pre-exploration. The comparison between Seq2Seq<sub>rand</sub> and Seq2Seq<sub>aps</sub> with the pre-exploration under val-unseen is shown in Table 1. We can see that the benefit is quite minor for Seq2Seq<sub>rand</sub>+pre-exploration (only 5% relative improvement). However, benefiting from the challenging paths sampled by our APS model, Seq2Seq<sub>aps</sub> can gain more than 11% relative improvement through the pre-exploration.

Table 2 presents the comparison between randomly sampled and APS sampled paths during pre-exploration for Seq2Seq<sub>aps</sub>. The original SR of Seq2Seq<sub>aps</sub> is 24.18. It shows that more challenging paths that are sampled by our APS model can benefit more when pre-exploring unseen environments than randomly sampled ones.

### 1.2 Ablation Study on RCM

The results (SR) under the val-unseen of RCM are shown in Table 3, which follow a similar trend as in Fig. 5.
